# Supplementary material
Source: PubMed Central journal article supplement (PMC3180867)
Supplement: NIHMS321581-supplement-1_si_001.pdf [file NIHMS321581-supplement-1_si_001.pdf]

## SUPPORTING INFORMATION

# Exploration of possible binding sites of nanoparticles on protein by crosslinking chemistry coupled with mass spectrometry

Ni Li,<sup>a</sup> Shang Zeng,<sup>a</sup> Le He, Wenwan Zhong\*

Department of Chemistry, University of California, Riverside, 92521

<sup>a</sup> These authors contributed equally to the work.

**Figure S1a.** TEM image of the PAA-Fe<sub>3</sub>O<sub>4</sub> NP (average diameter = 8.02 ± 1.26 nm (n = 100)).

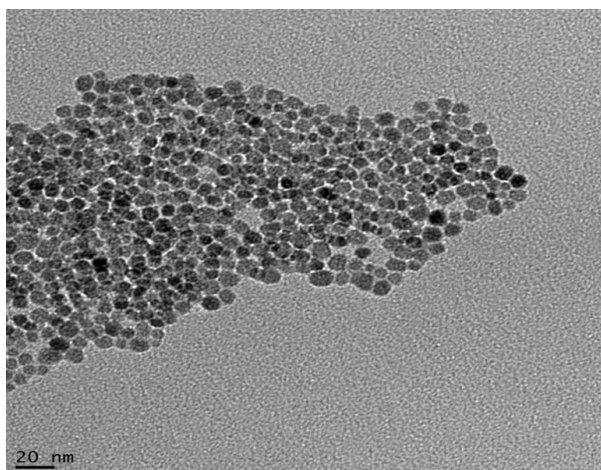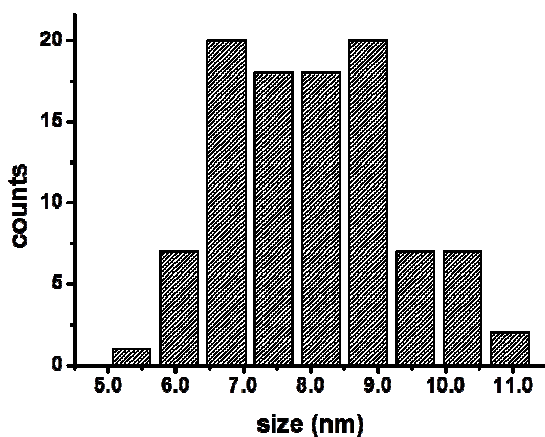

**Figure S1b. Zeta potential calculation from CE data. Top: Electropherogram of the 8.02-nm NPs; Bottom: Zeta potential calculated by the electrophoretic mobility of NPs from the equation<sup>1</sup> shown below the plot.**

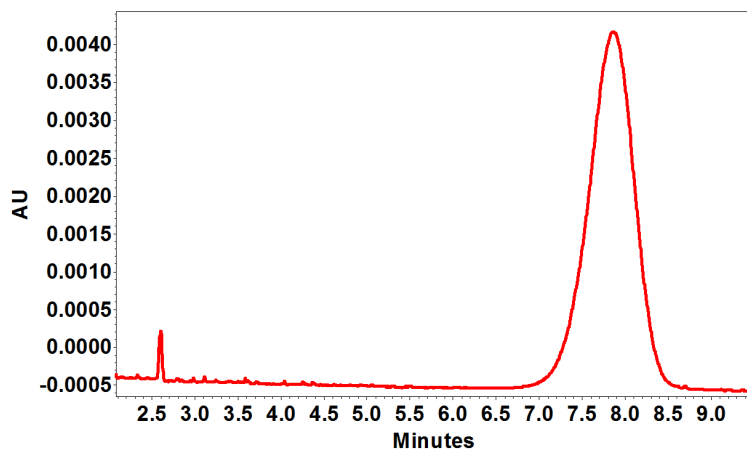

| Fe <sub>3</sub> O <sub>4</sub> NPs | Electrophoretic mobility (m <sup>2</sup> V <sup>-1</sup> S <sup>-1</sup> ) | Zeta potential (mV) |
|------------------------------------|----------------------------------------------------------------------------|---------------------|
| 8.02 nm                            | $-3.44 \times 10^{-8} \pm 4.01 \times 10^{-11}$                            | $-44.03 \pm 0.08$   |

$$\zeta = \frac{\mu_e \cdot \eta}{\varepsilon} = \frac{\mu_e \cdot \eta}{\varepsilon_0 \cdot \varepsilon_r} = \frac{\mu_e \cdot 8.90E-4}{8.854187817E-12 \cdot 78.4}$$

**Reference:**

1. Schnabel, U.; Fischer, C.-H.; Kenndler, E. *J. Microcolumn Sep.* **1997**, *9*, 529-534.

**Figure S1c.  $K_D$  values for interaction of the PAA- $Fe_3O_4$  NPs with various proteins.**

| <b>Protein</b>       | <b>Mw (kDa)</b> | <b>Dimension (nm)</b>        | <b>n</b>            | <b><math>K_D</math> (M)</b> |
|----------------------|-----------------|------------------------------|---------------------|-----------------------------|
| apo-calmodulin       | 17              | $2.1 \times 2.1 \times 5.8$  | 2.1                 | $1.51 \times 10^{-8}$       |
| beta-casein          | 24              |                              | 1.3                 | $4.60 \times 10^{-6}$       |
| bovine serum albumin | 66              | $2.7 \times 2.7 \times 11.6$ | 1.1                 | $1.37 \times 10^{-5}$       |
| gamma-globulin       | 60-70           |                              | 1.0                 | $3.36 \times 10^{-7}$       |
| Superoxide dismutase | 32.5            | $7.2 \times 4.0 \times 3.8$  | Too weak to measure |                             |
| Insulin              | 5.8             | $2.0 \times 2.5 \times 2.0$  | Too weak to measure |                             |

**Figure S2. MALDI-Q-TOF MS/MS results for peptide peak at m/z 1640 KVPQVSTPTLVEVSR. Search result was obtained by MASCOT with an ions score of 44. There are 22 matches out of 84 fragment ions using 64 most intense peaks.**

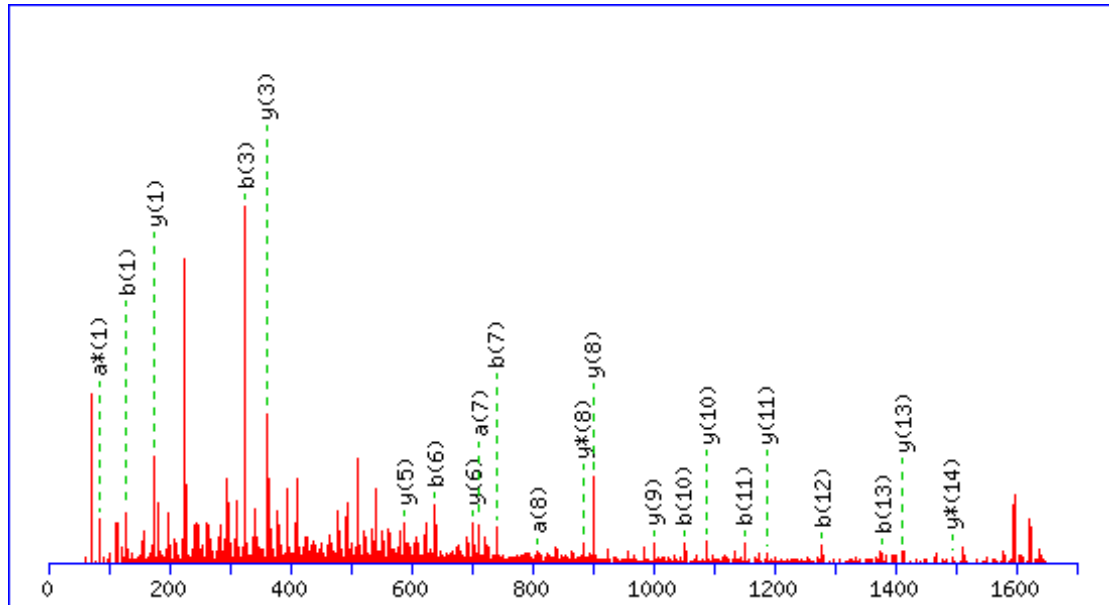

**Figure S3. MALDI-TOF-MS spectrum for the tryptic digestion of HSA. A total of 13 peptides were consistently identified and they are listed in the table below.**

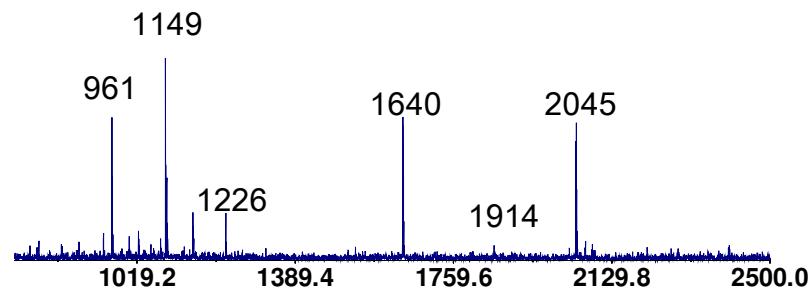

List of typical HSA peptides found in our samples:

| <b>m/z</b> | <b>Sequence</b>   |
|------------|-------------------|
| 649        | CASLQK            |
| 674        | TPVSDR            |
| 715        | AACLLPK           |
| 789        | LVTDLTK           |
| 927        | YLYEIAR           |
| 940        | DDNPNLPR          |
| 961        | FQNALLVR          |
| 1074       | LDEL RDEGK        |
| 1149       | LVNEVTEFAK        |
| 1226       | FKDLGEENFK        |
| 1386       | YICENQDSISSK      |
| 1640       | KVPQVSTPTLVEVSR   |
| 2045       | VFDEFKPLVEEPQNLIK |

Figure S4. Circular dichroism spectra of  $2.2 \times 10^{-7}$  mol/L HSA (black) and  $2.2 \times 10^{-7}$  mol/L HSA with  $2.4 \times 10^{-8}$  mol/L PAA-Fe<sub>3</sub>O<sub>4</sub> NPs (red).

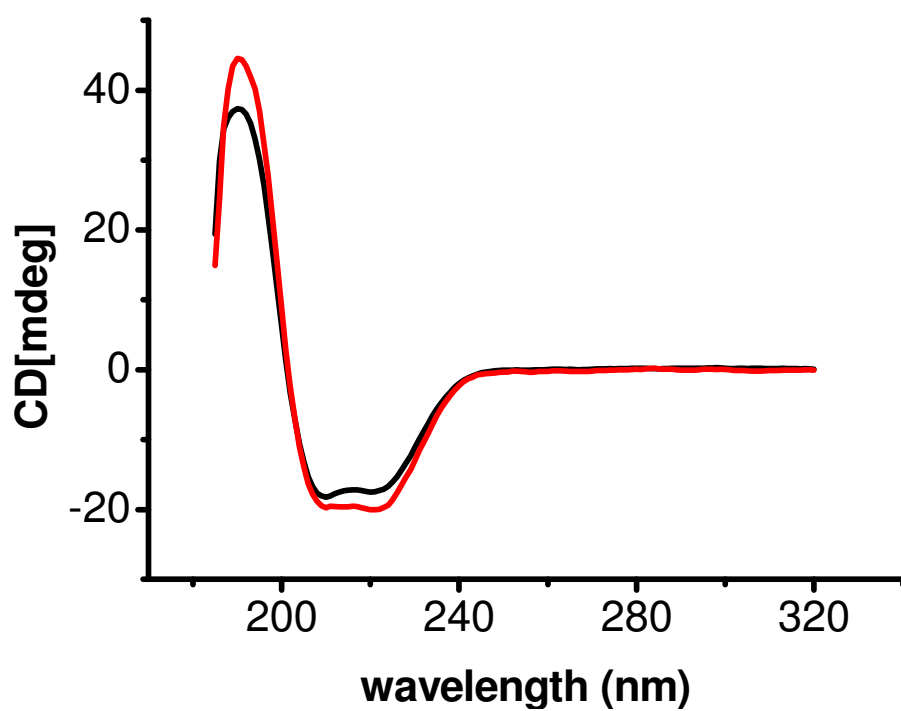

**Figure S5a. Electropherograms showing no interaction between ibuprofen and the PAA-coated Fe<sub>3</sub>O<sub>4</sub> NPs. In this test, the ibuprofen was dissolved in 50% ethanol (HPLC grade, Fisher Scientific) to make a series of stock solutions with concentration from  $4.84 \times 10^{-4}$  M to  $9.70 \times 10^{-3}$  M. Two micro liters of the drug stock solution at different concentration was mixed with  $9.4 \times 10^{-12}$  mol NPs in a total volume of 20  $\mu$ L which contained 5% ethanol. After overnight incubation, these samples were analyzed with capillary electrophoresis. No shift was observed in either the peak of NPs or that of ibuprofen, indicating no interaction occurring between these two. All traces were measured at 200 nm.**

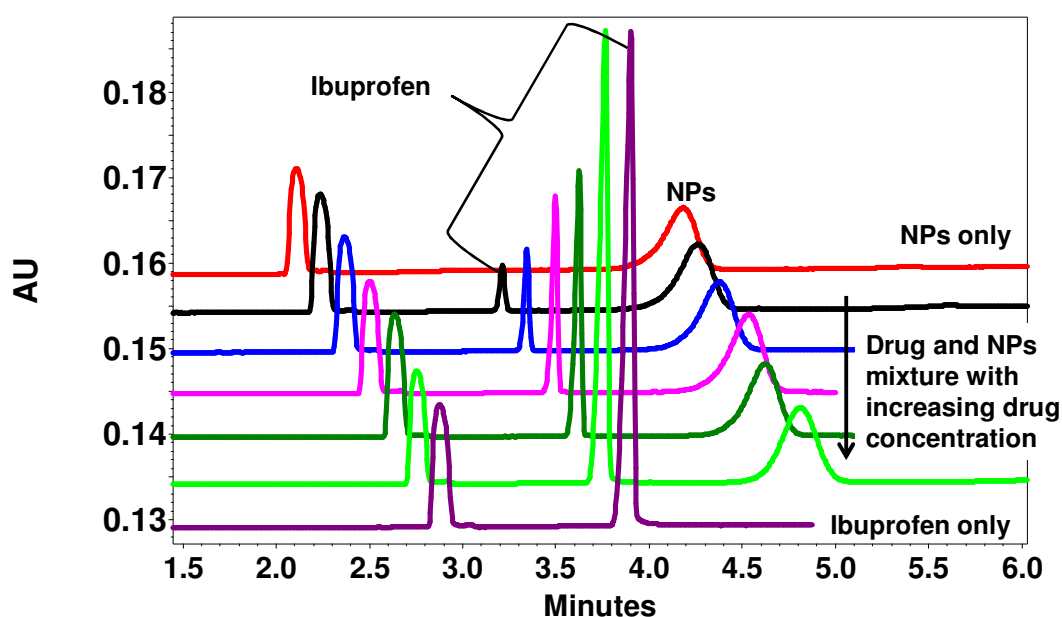

**Figure S5b. Electropherograms of incubation of HSA with NPs and ibuprofen at ibuprofen concentration equal to or larger than  $9.70 \times 10^{-4}$  M. Traces were measured at 288 nm.**

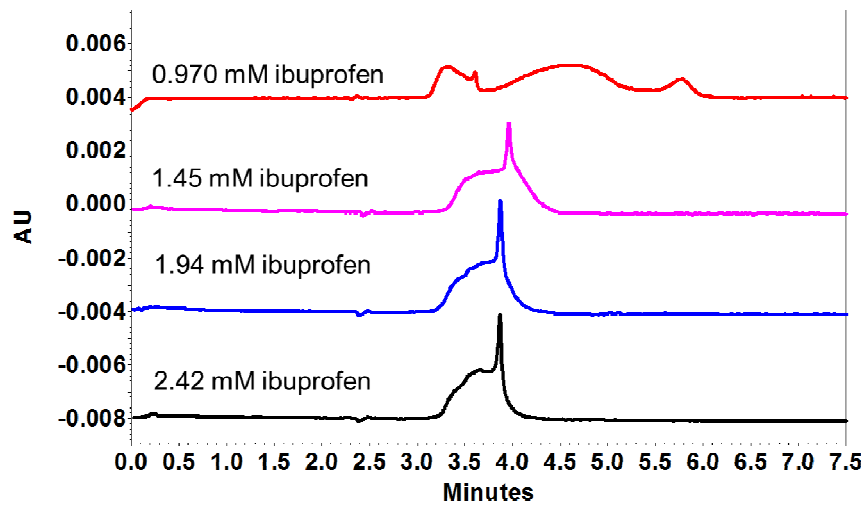



**Figure S5c. Crystal structure of HSA bound with fusidic acid (PDB ID: 2VUF)**

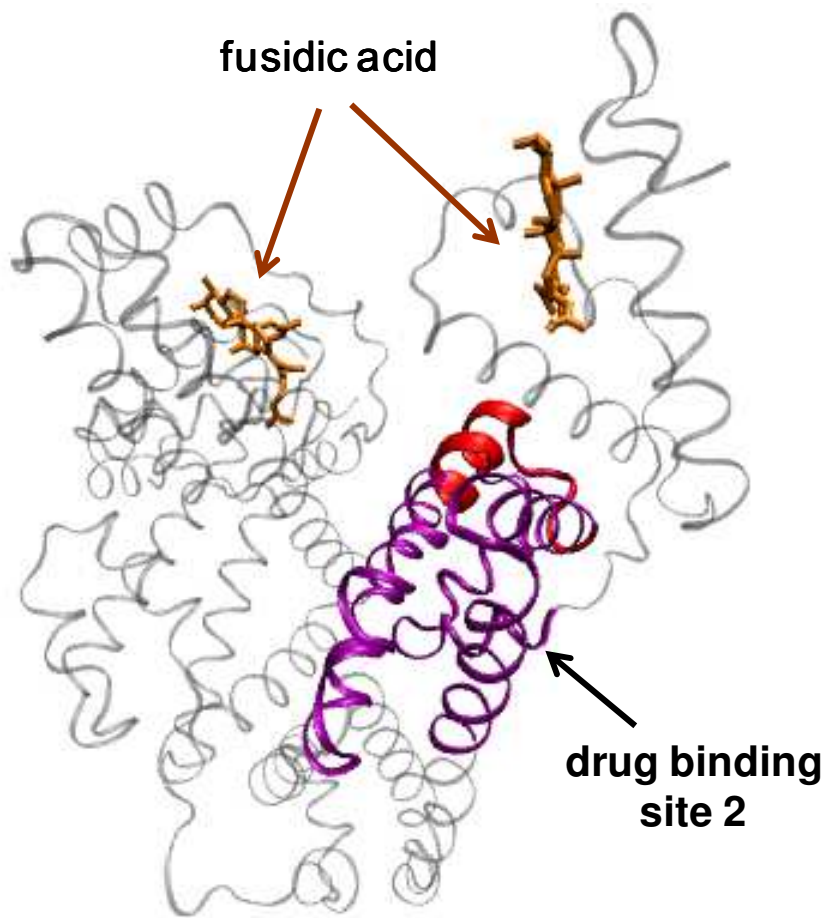

**Figure S5d. Effect of fusidic acid on binding affinity between HSA and PAA-Fe<sub>3</sub>O<sub>4</sub> NPs. The  $\theta$  obtained with no fusidic acid was set as 1.0 for normalization.**

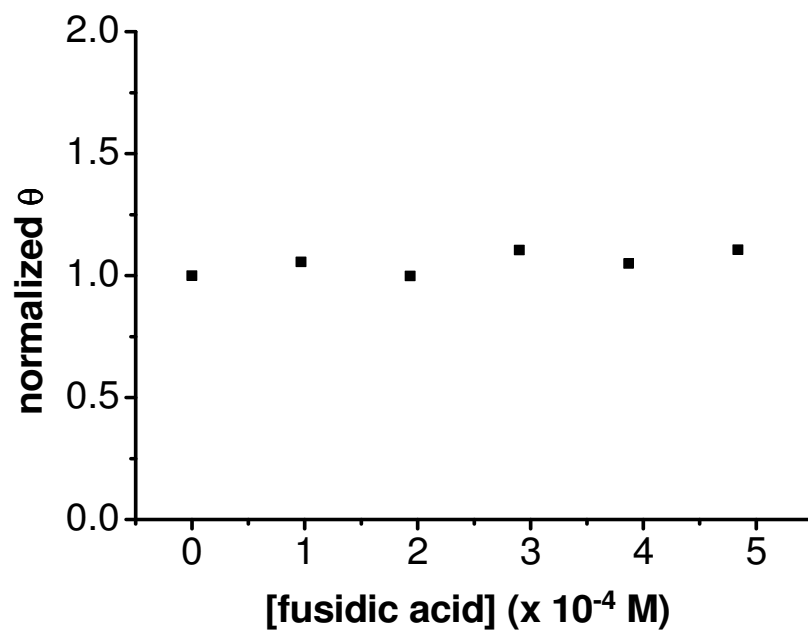

**Figure S6. Molecular structures of ibuprofen and fusidic acid.**

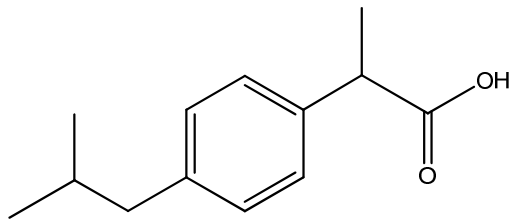

**Ibuprofen**

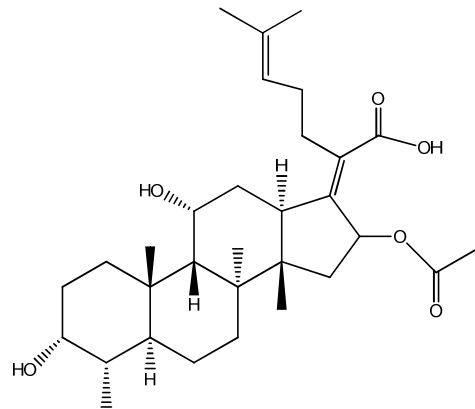

**Fusidic Acid**
